# Supplementary material for: Direct binding of polymeric GBP1 to LPS disrupts bacterial cell envelope functions
Source: PubMed Central journal article supplement — EMBO J. 2020 Jun 8;39(13):e104926. doi: 10.15252/embj.2020104926 (PMC7327485; doi:10.15252/embj.2020104926), 2020-06-08
Supplement: EMBJ-39-e104926-s001.pdf [file EMBJ-39-e104926-s001.pdf]

**Table of content**

**Appendix Figure S1**

**Appendix Figure S2**

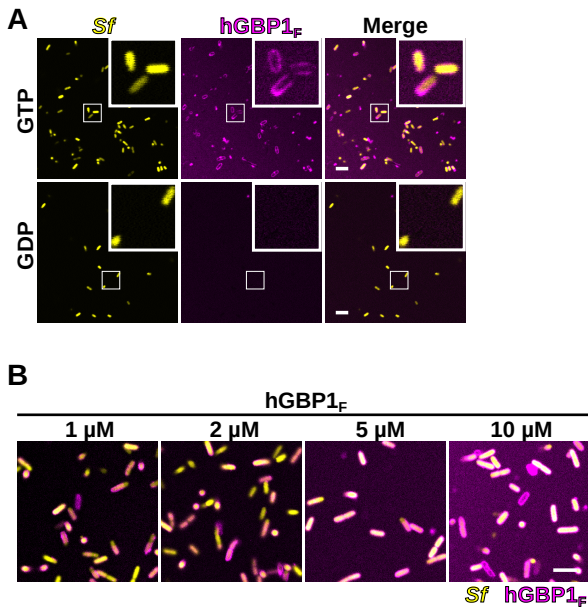

**Appendix Figure S1.** Related to Figure 1. **hGBP1<sub>F</sub> binds to live *S. flexneri* in the presence of GTP.**

**(A)** Confocal images of GFP<sup>+</sup> *S. flexneri* following 45 min incubation with 25 μM Alexa-Fluor647-labeled hGBP1<sub>F</sub> and 20 mM GTP or 5 mM GDP. Scale bars equal 5 μm. **(B)** Confocal images of formaldehyde fixed GFP<sup>+</sup> *S. flexneri* following 45 min incubation with varying concentrations of Alexa-Fluor647-hGBP1<sub>F</sub> and 2 mM GTP. All scale bars equal 5 μm.

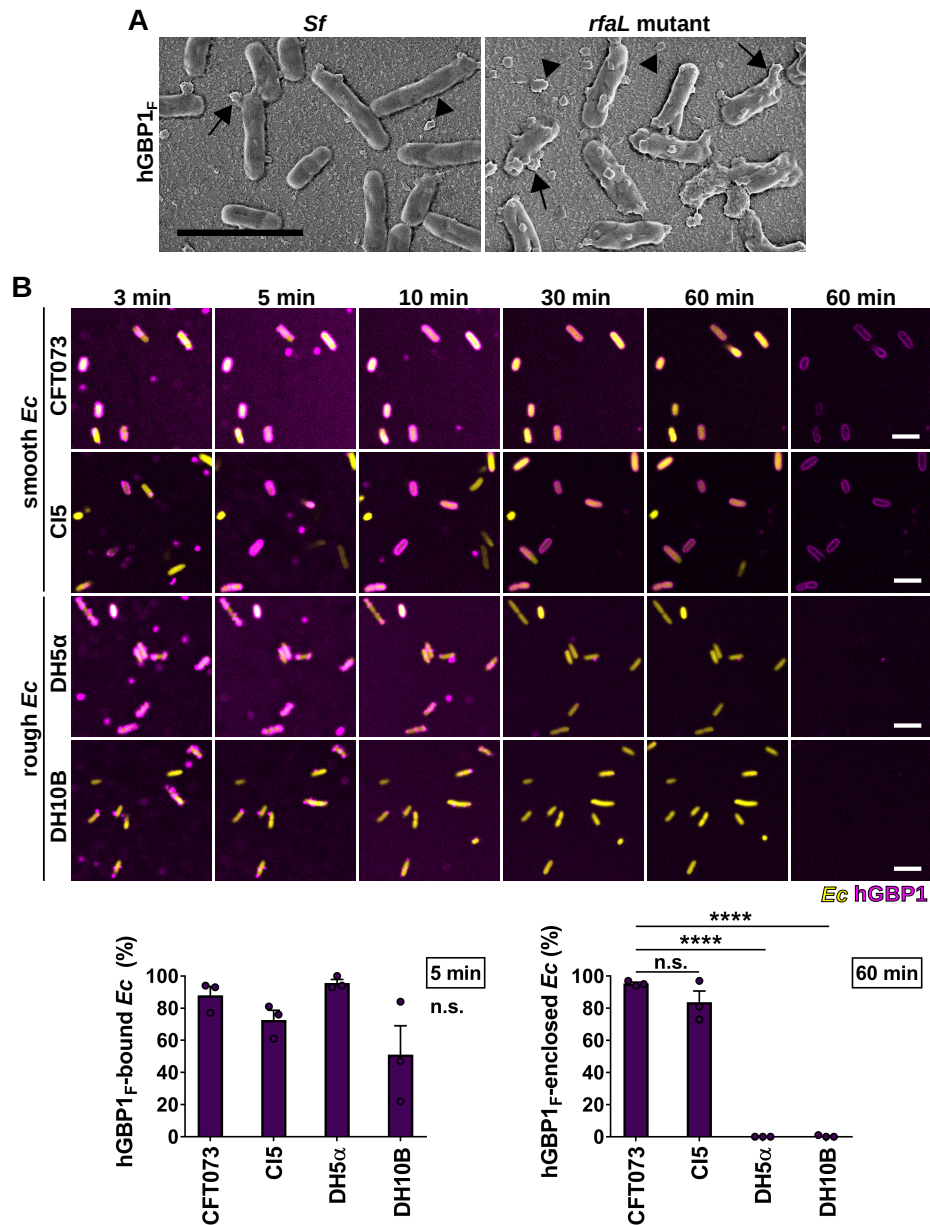

**Appendix Figure S2. Related to Figure 5. O-antigen is required for hGBP1<sub>F</sub> protein coating of *E. coli*.**

**(A)** Scanning-electron micrographs of live wild type and *rfaL* *S. flexneri* incubated for 45 min with 5 μM of hGBP1<sub>F</sub> in the presence of 2 mM GTP. Arrowheads point to unattached hGBP1 polymers and arrows point to hGBP1 polymers attached to bacteria. **(B)** Confocal time-lapse microscopy of formaldehyde fixed smooth and rough *E. coli* strains expressing RFP (UPEC CFT073, UPEC CI5) or GFP (DH5α, DH10B) after addition of 10 μM Alexa-Fluor488- or Alexa-Fluor647-hGBP1<sub>F</sub> supplemented with 2 mM GTP. Binding of hGBP1<sub>F</sub> polymers to bacteria at 5 min and enclosure of bacteria with hGBP1<sub>F</sub> protein coats after 60 min were quantified. Mean frequencies ± SEM of combined data from three independent experiments are shown. Significance was determined by one-way ANOVA with Tukey's multiple comparison test. n.s., not significant; \*\*\*\*, P ≤ 0.0001. Scale bars equal 5 μm.
